# Supplementary material for: Structural insights into dsRNA processing by Drosophila Dicer-2–Loqs-PD
Source: PubMed Central journal article supplement (PMC9279154; doi:10.1038/s41586-022-04911-x), 2022-06-29

---

**Supplementary information**

---

**Structural insights into dsRNA processing by  
*Drosophila* Dicer-2–Loqs-PD**

---

In the format provided by the  
authors and unedited

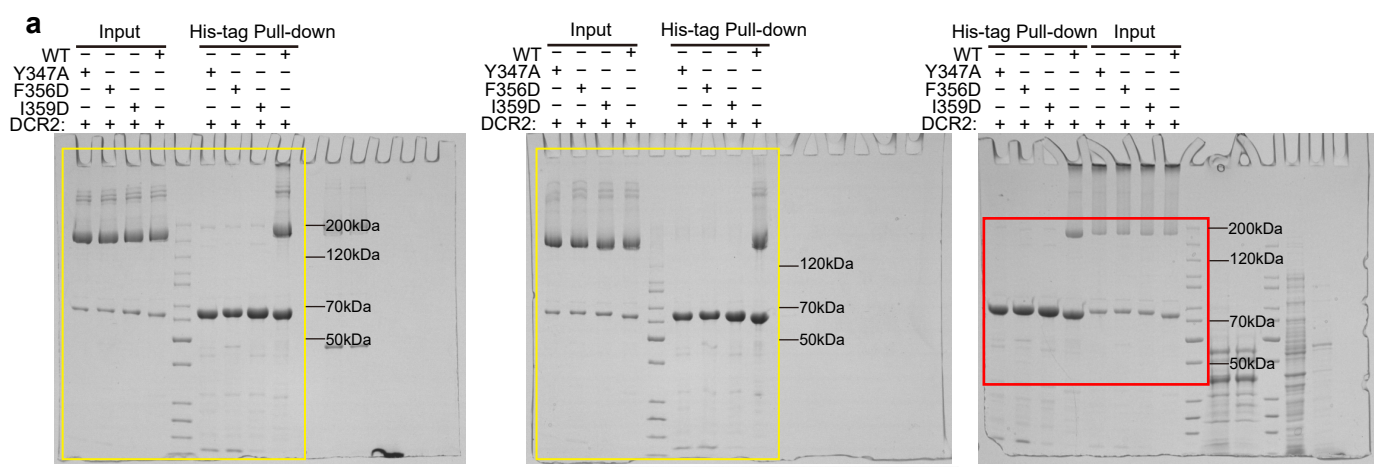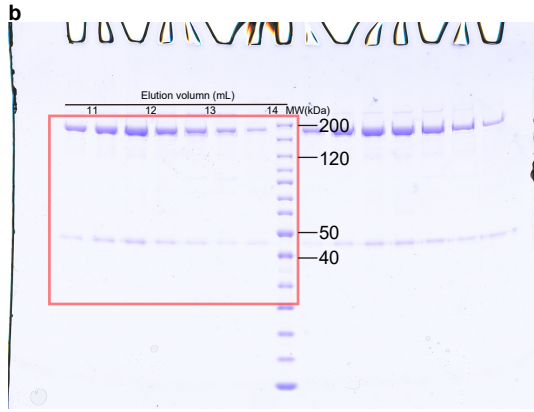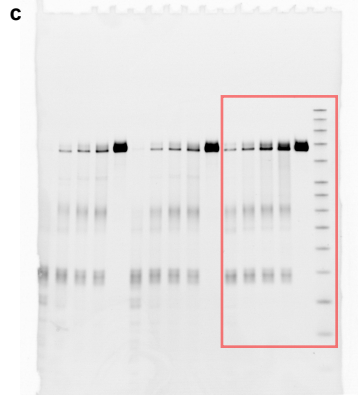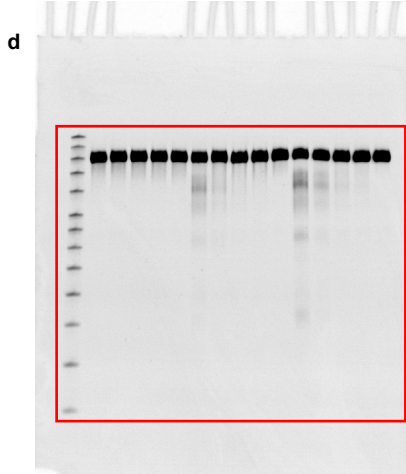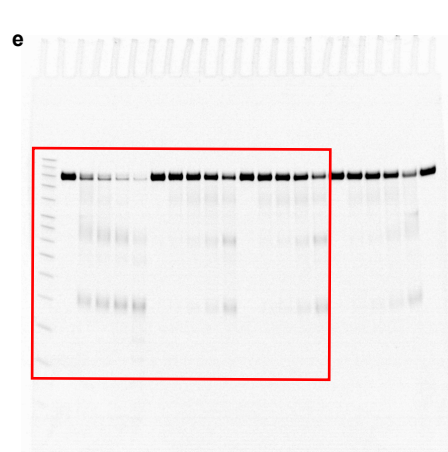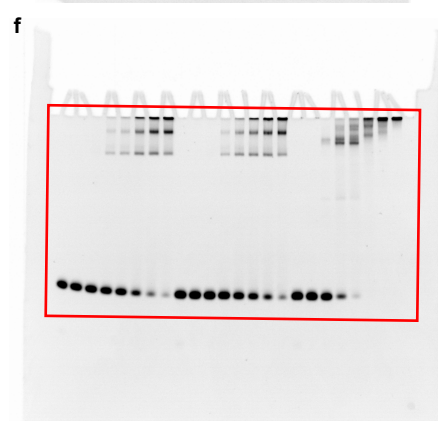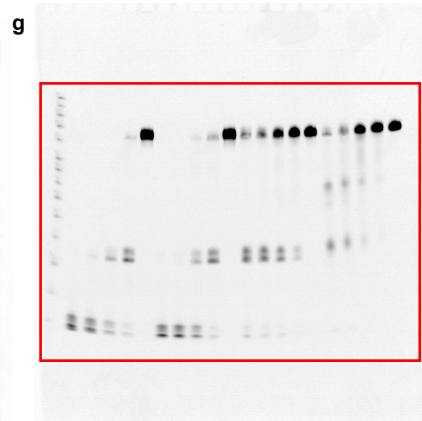

Supplement: 41586_2022_4911_MOESM1_ESM.pdf [file 41586_2022_4911_MOESM1_ESM.pdf]
